# Supplementary material for: Efficient Activation of Peroxymonosulfate by Biochar-Loaded Zero-Valent Copper for Enrofloxacin Degradation: Singlet Oxygen-Dominated Oxidation Process
Source: MDPI journal article supplement (doi:10.3390/nano12162842), 2022-08-18
Supplement: s1 [file s1]

# Efficient Activation of Peroxymonosulfate by Biochar-Loaded Zero-Valent Copper for Enrofloxacin Degradation: Singlet Oxygen-Dominated Oxidation Process

Jiang Zhao <sup>1,†</sup>, Tianyin Chen <sup>1,†</sup>, Cheng Hou <sup>1</sup>, Baorong Huang <sup>1</sup>, Jiawen Du <sup>1</sup>, Nengqian Liu <sup>1</sup>, Xuefei Zhou <sup>1,2,\*</sup> and Yalei Zhang <sup>1,2,\*</sup>

<sup>1</sup> State Key Laboratory of Pollution Control and Resources Reuse, College of Environmental Science and Engineering, Tongji University, Shanghai 200092, China

<sup>2</sup> Shanghai Institute of Pollution Control and Ecological Security, Shanghai 200092, China

\* Correspondence: zhouxuefei@tongji.edu.cn (X.Z.); zhangyalei@tongji.edu.cn (Y.Z.); Tel./Fax: +86-21-65985811 (Y.Z.)

† These authors contributed equally to this work.

**Table S1.** Details of the eluents and detection wavelengths of HPLC.

| Compound     | Eluents                                                                  | Wavelengths (nm) |
|--------------|--------------------------------------------------------------------------|------------------|
| Enrofloxacin | acetonitrile: (0.35% phosphoric acid + triethylamine, pH = 3.0) = 17: 83 | 277              |

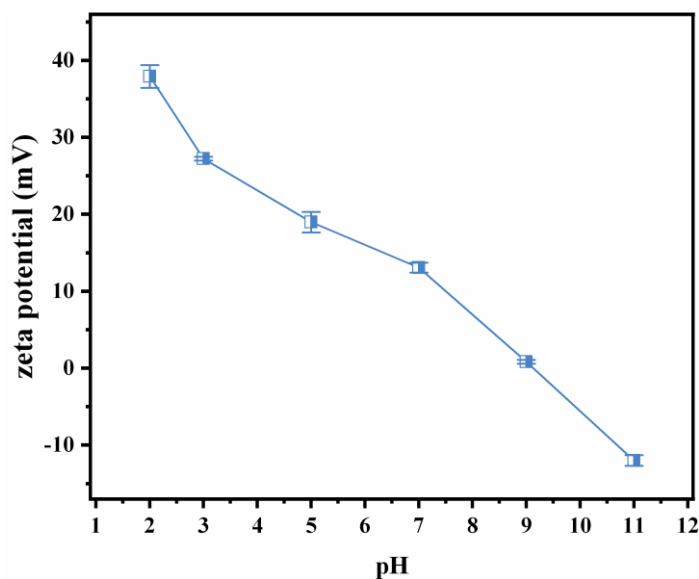

**Figure S1.** The zeta potential of CuC in different pH.

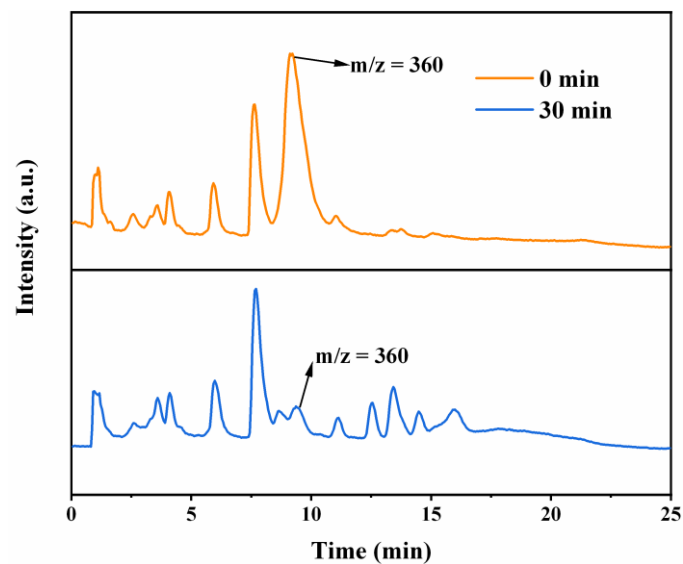

**Figure S2.** LC-MS chromatogram of 0 min and 30 min.

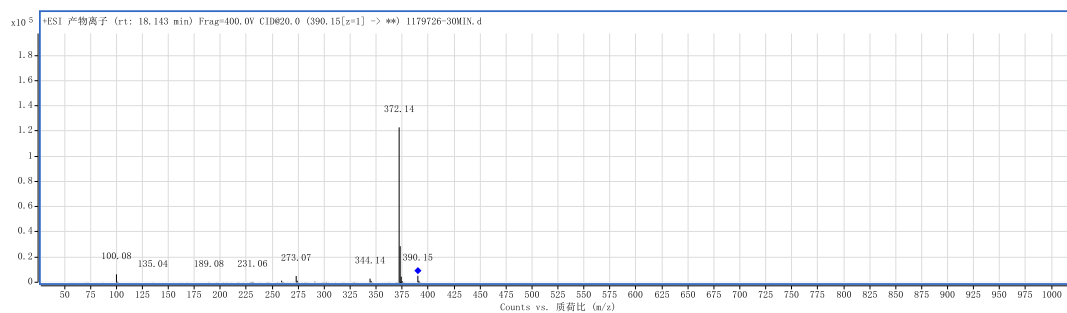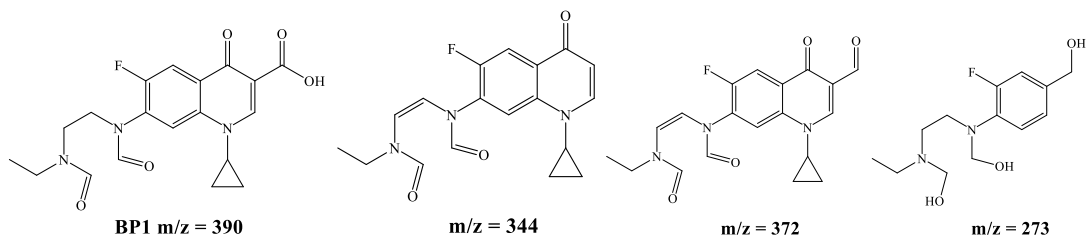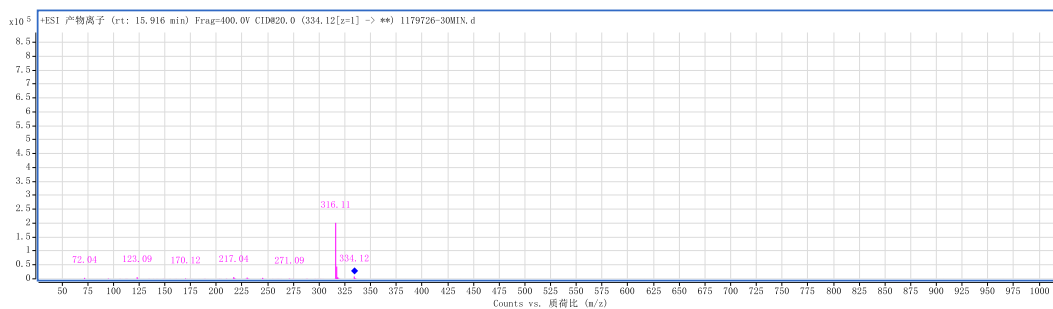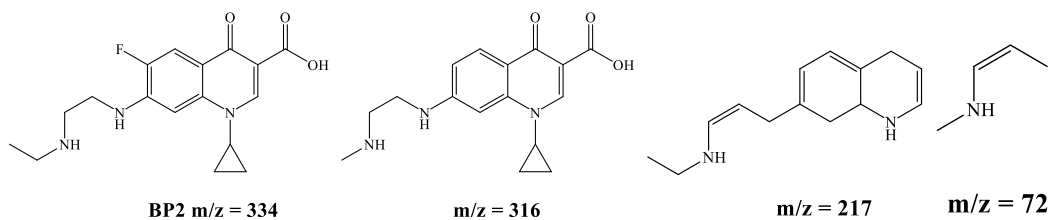

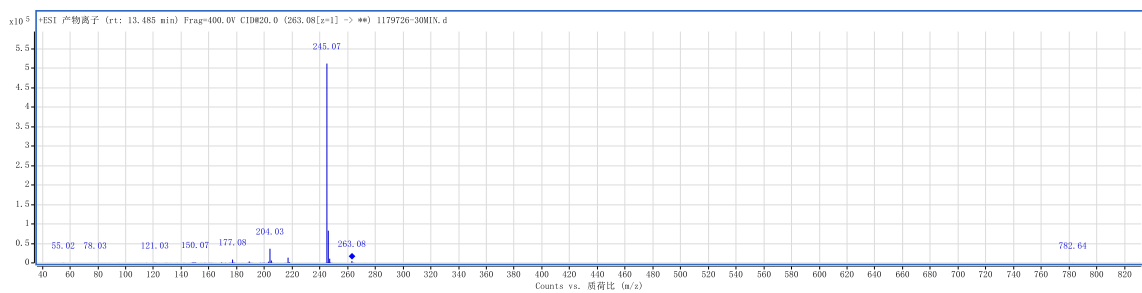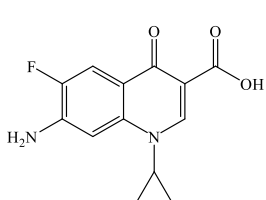

BP3 m/z = 262

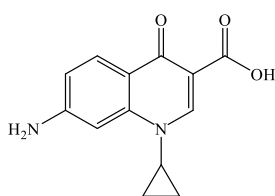

m/z = 245

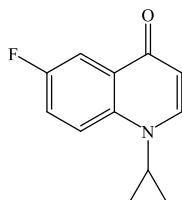

m/z = 204

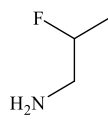

m/z = 78

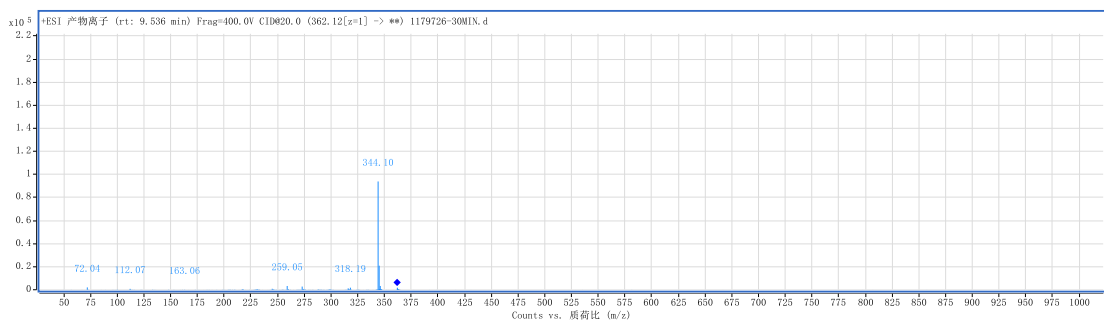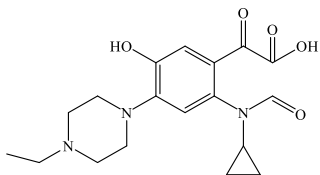

BP4 m/z = 362

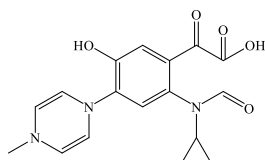

m/z = 344

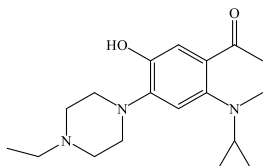

m/z = 318

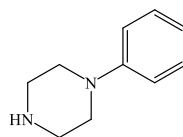

m/z = 163

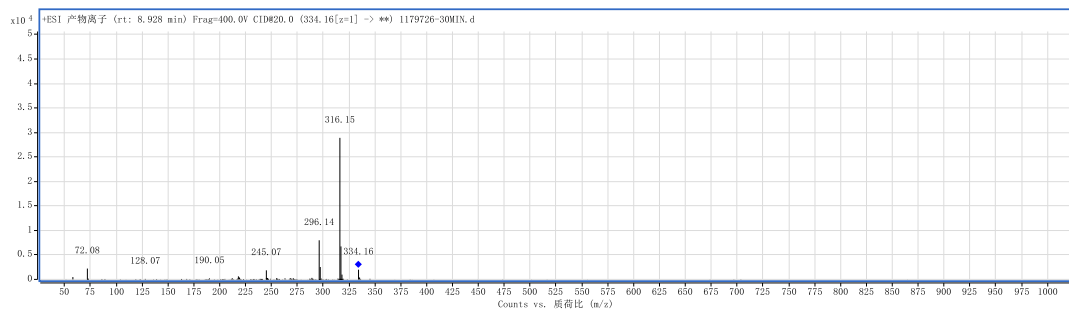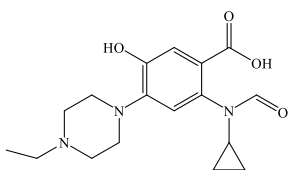

BP5 m/z = 334

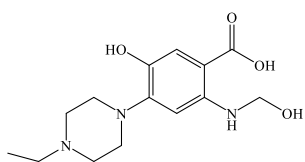

m/z = 296

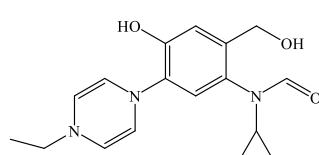

m/z = 316

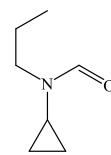

m/z = 128

Figure S3. Secondary MS spectra of the ENR and the possible identified intermediates.
